# Supplementary material for: Person-Oriented Recovery of Individuals With Serious Mental Illnesses: A Review and Meta-Analysis of Longitudinal Findings
Source: Atypon-hosted journal article supplement (doi:10.1176/appi.ps.201700058), 2017-12-01
Supplement: appi.ps.201700058.ds001.pdf [file appi.ps.201700058.ds001.pdf]

Flow diagram of search process

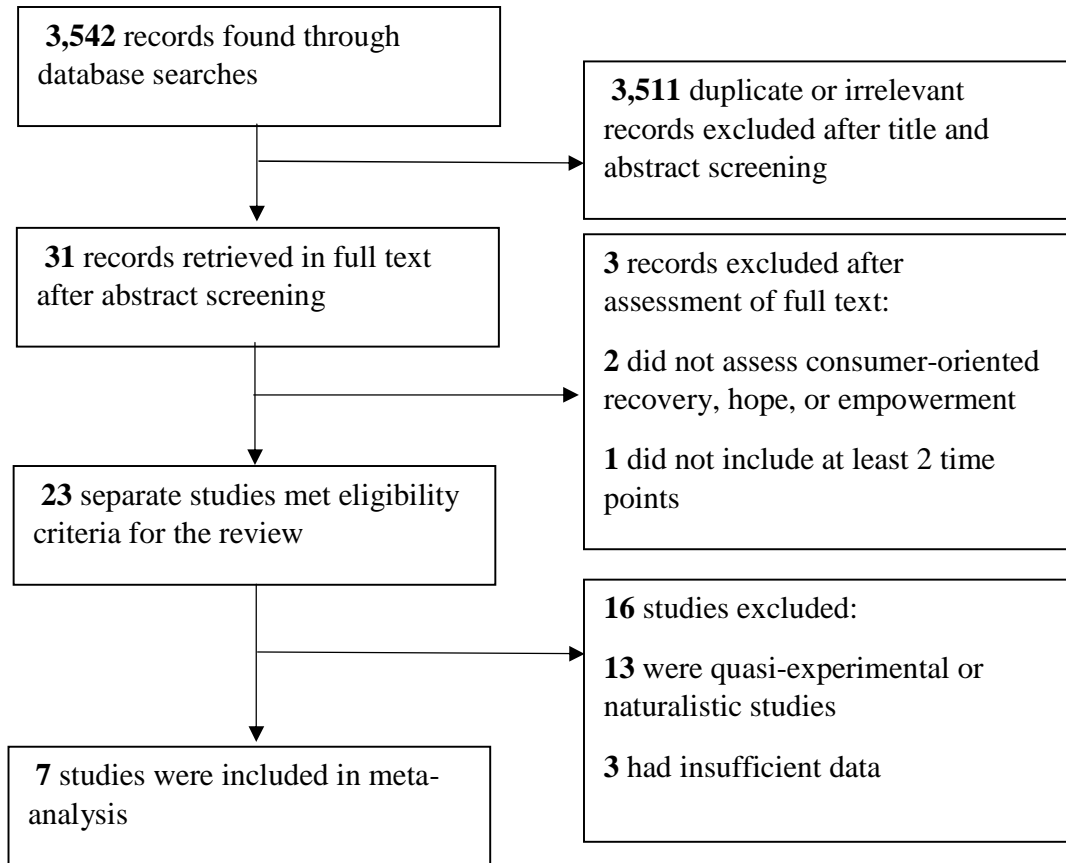

Sample, Study, and Intervention Characteristics of Studies Included in Review

| Study                                                        | Methods                   |                |                          | Participants         |      |      |            |    |                        |    |                      |         | Interventions                |                           |                            |                        |           | Outcomes              |                        |                                  |                                                                                                 |
|--------------------------------------------------------------|---------------------------|----------------|--------------------------|----------------------|------|------|------------|----|------------------------|----|----------------------|---------|------------------------------|---------------------------|----------------------------|------------------------|-----------|-----------------------|------------------------|----------------------------------|-------------------------------------------------------------------------------------------------|
|                                                              | Study design <sup>a</sup> | # Study groups | Type of comparison group | Total N <sup>b</sup> | Age  |      | Sex (male) |    | Race/ethnicity (White) |    | Setting <sup>c</sup> | Country | Name <sup>d</sup>            | Freq/dur                  | Provider type <sup>e</sup> | Mean sessions attended | M o d e r | Out-come <sup>f</sup> | Meas-ures <sup>h</sup> | Time points                      | Main findings                                                                                   |
|                                                              |                           |                |                          |                      | M    | SD   | n          | %  | n                      | %  |                      |         |                              |                           |                            |                        |           |                       |                        |                                  |                                                                                                 |
| Barbic et al., 2009                                          | RCT                       | 2              | Active                   | 33                   | -    | -    | 22         | 67 | -                      | -  | O                    | CA      | Recovery workbook            | Weekly/12 weeks           | B                          | -                      | G         | R, H, E               | RAS, HHI, ES           | BL, 12 weeks                     | Intervention group reported higher hope, empowerment, & recovery than treatment as usual group. |
| Berry et al., 2014                                           | RCT                       | 2              | Assessment & Monitoring  | 325                  | 37.9 | 9.7  | 281        | 86 | 264                    | 81 | -                    | UK      | Motivational interviewing    | Every other week/52 weeks | MHP                        | -                      | I         | E                     | MDES                   | BL, 52 weeks, 104 weeks          | Treatment did not have positive effect on empowerment.                                          |
| Bullock et al., 2000                                         | QE                        | 4              | Waitlist                 | 68                   | 45.7 | 9.2  | 18         | 26 | 45                     | 66 | O                    | US      | Leadership education program | Weekly/16 weeks           | B                          | 9.60                   | G         | R, E                  | RAQ, MDES              | BL, 16 weeks, 42 weeks           | Treatment group reported higher empowerment after training than control group.                  |
| Compton et al., 2015                                         | N                         | 1              | NA                       | 72                   | 38.7 | 12.9 | 37         | 51 | 37                     | 51 | I                    | US      | Opening doors to recovery    | Weekly/52 weeks           | B                          | -                      | I         | R                     | MHRM                   | BL, 17 weeks, 35 weeks, 52 weeks | Program was effective at promoting recovery.                                                    |
| Cook et al., 2012a; Cook et al., 2012b; Jonikas et al., 2013 | RCT                       | 2              | Waitlist                 | 519                  | 45.8 | 9.9  | 177        | 34 | 328                    | 63 | O                    | US      | WRAP                         | Weekly/8 weeks            | P                          | 5.00                   | G         | R, H                  | RAS, HS                | BL, 9 weeks, 35 weeks            | Intervention group reported higher hope & recovery than control group.                          |
| Cook et al., 2012c; Pickett et                               | RCT                       | 2              | Waitlist                 | 428                  | 42.8 | 10.9 | 190        | 44 | 229                    | 54 | O                    | US      | BRIDGES                      | Weekly/8 weeks            | P                          | 4.86                   | G         | R, H, E               | RAS, SHS, ES           | BL, 9 weeks, 35                  | Intervention group reported higher                                                              |

|                                  |     |   |        |     |      |      |     |    |    |    |   |    |                        |                    |     |   |   |      |                  |                             |                                                                                                                                                   |
|----------------------------------|-----|---|--------|-----|------|------|-----|----|----|----|---|----|------------------------|--------------------|-----|---|---|------|------------------|-----------------------------|---------------------------------------------------------------------------------------------------------------------------------------------------|
| al., 2012; Steigman et al., 2014 |     |   |        |     |      |      |     |    |    |    |   |    |                        |                    |     |   |   |      |                  | weeks                       | recovery & empowerment, & improved in some aspects of hope, compared to control group.                                                            |
| Dixon et al., 2014               | RCT | 2 | Active | 226 | 51.5 | 9.1  | 190 | 84 | 82 | 36 | O | US | REORDER                | -                  | MHP | - | I | R    | MHRM             | BL, 26 weeks                | Intervention group trended toward higher overall recovery than control group, & was higher in "stuckness" subscale of measure than control group. |
| Fukui et al., 2011               | QE  | 2 | Active | 114 | 43.5 | 11.0 | 43  | 38 | 74 | 65 | O | US | WRAP                   | Weekly/ 8-12 weeks | B   | - | G | R, H | RMQ, SHS         | BL, 8-12 weeks, 24-30 weeks | Intervention group saw significant increases in hope compared to control, but there was no difference for recovery.                               |
| Hicks et al., 2012               | N   | 1 | NA     | 61  | 45.6 | 10.9 | -   | 62 | -  | -  | O | AU | Collaborative recovery | -                  | -   | - | I | R, H | RAS (short), DHS | BL, 26 weeks                | No significant changes or effects for recovery or hope. Recovery slightly (but not significantly) decreased from                                  |

|                         |     |   |        |     |      |      |     |    |     |     |   |         |                                                               |                            |     |       |   |      |                  |                                  |                                                                                                 |
|-------------------------|-----|---|--------|-----|------|------|-----|----|-----|-----|---|---------|---------------------------------------------------------------|----------------------------|-----|-------|---|------|------------------|----------------------------------|-------------------------------------------------------------------------------------------------|
|                         |     |   |        |     |      |      |     |    |     |     |   |         |                                                               |                            |     |       |   |      |                  | baseline to follow-up.           |                                                                                                 |
| Jørgensen et al., 2015  | RCT | 2 | Active | 101 | 37.5 | 12.6 | 47  | 45 | 101 | 100 | O | DK      | Guided self-determination                                     | Every other week/ 26 weeks | MHP | -     | I | R    | RAS              | BL, 13 weeks, 26 weeks, 52 weeks | Recovery increased from baseline to 6 month to 12 month follow-up.                              |
| Law et al., 2016        | N   | 1 | NA     | 174 | 37.3 | 11.6 | 76  | 69 | 92  | 84  | B | UK      | NA                                                            | -                          | -   | -     | - | R    | QPR              | BL, 26 weeks                     | Recovery predicted by negative emotion, self-esteem, hope, symptoms & functioning at follow-up. |
| Littrell et al., 1996   | N   | 1 | NA     | 14  | 33.0 | -    | 12  | 86 | -   | -   | O | US      | Psychosocial treatment + clozapine                            | Daily/ 52 weeks            | -   | -     | G | H    | HHI              | BL, 26 weeks, 52 weeks           | Hope increased over time.                                                                       |
| Livingston et al., 2013 | N   | 1 | NA     | 25  | 42.0 | 10.8 | 20  | 80 | 22  | 88  | I | CA      | Patient engagement intervention                               | Weekly or daily/ 83 weeks  | P   | 13.16 | B | R, E | MHRM, MDES, RSAS | BL, 39 weeks                     | No significant changes in recovery & empowerment.                                               |
| McCay et al., 2006      | RCT | 2 | Active | 47  | -    | -    | 34  | 72 | -   | -   | - | CA      | Group treatment for first-episode psychosis                   | Weekly/ 12 weeks           | MHP | -     | G | H    | MHS              | BL, 13 weeks                     | Intervention group reported higher hope than control group.                                     |
| Mueser et al., 2006     | N   | 1 | NA     | 24  | 39.1 | 11.2 | 15  | 63 | 16  | 67  | O | US & AU | IMR                                                           | Weekly/ 39 weeks           | MHP | -     | B | R    | RAS              | BL, 39 weeks, 52 weeks           | Intervention group reported higher hope on RAS at follow-up.                                    |
| Ratzlaff et al., 2006   | N   | 1 | NA     | 84  | -    | -    | 34  | 40 | 64  | 76  | O | US      | Kansas consumer as provider (CAP) supported education program | -                          | -   | -     | B | R, H | RREEM, SSHS      | -                                | Intervention group saw improved hope and recovery.                                              |
| Resnick                 | QE  | 2 | Active | 296 | 48.5 | 8.7  | 281 | 95 | 194 | 66  | O | US      | Vet-to-vet                                                    | Daily/                     | P   | -     | G | R, E | RAQ,             | BL,                              | Interven-                                                                                       |

|                                         |     |   |          |     |      |      |     |    |     |    |   |    |                               |                   |     |      |   |      |                 |                             |                                                                                                 |
|-----------------------------------------|-----|---|----------|-----|------|------|-----|----|-----|----|---|----|-------------------------------|-------------------|-----|------|---|------|-----------------|-----------------------------|-------------------------------------------------------------------------------------------------|
| et al., 2008                            |     |   |          |     |      |      |     |    |     |    |   |    |                               | 39 weeks          |     |      |   |      | MDES            | 4 weeks, 13 weeks, 39 weeks | tion group reported higher empowerment.                                                         |
| Russinova et al., 2014                  | RCT | 2 | Waitlist | 82  | 47.7 | 11.9 | 26  | 32 | 57  | 70 | O | US | Antistigma photovoice program | Weekly/10 weeks   | P   | 6.93 | G | R, E | PGRS, ES        | BL, 10 weeks, 23 weeks      | Intervention group reported higher empowerment compared to other group.                         |
| Salyers et al., 2014; Oles et al., 2015 | RCT | 2 | Active   | 118 | 47.7 | 8.9  | 94  | 80 | 40  | 34 | O | US | IMR                           | Weekly/39 weeks   | MHP | 8.30 | G | R, H | RAS, SHS        | BL, 39 weeks, 78 weeks      | No significant difference between groups in recovery or hope.                                   |
| Salyers et al (under review)            | N   | 1 | NA       | 167 | 44.1 | 10.4 | 95  | 57 | 59  | 35 | O | US | Common-Ground                 | -                 | B   | -    | I | R,H  | RAS,SHS         | BL, 52 weeks, 78 weeks      | Hope & recovery generally improved over time.                                                   |
| Starnino et al., 2010                   | N   | 1 | NA       | 30  | 42.0 | 10.9 | 12  | 40 | 28  | 93 | O | US | WRAP                          | Weekly/8-12 weeks | -   | -    | G | R, H | SHS, RMQ        | BL, 8-12 weeks              | Intervention group reported improved in recovery & hope.                                        |
| Stumbo et al., 2015                     | N   | 1 | NA       | 165 | 49.0 | 14.4 | 79  | 48 | 157 | 95 | O | US | NA                            | -                 | -   | -    | B | R    | RAS             | BL, 52 weeks, 104 weeks     | Adult experiences may better predict recovery than childhood experiences.                       |
| Van Gestel-Timmermans et al., 2012      | RCT | 2 | Waitlist | 333 | 44.0 | 11.0 | 113 | 34 | -   | -  | B | NL | Recovery is up to you         | Weekly/12 weeks   | P   | 9.00 | G | H, E | HHI, ES (Dutch) | BL, 13 weeks, 26 weeks      | Intervention group reported improved hope & empowerment post-treatment, & at 3 month follow-up. |

<sup>a</sup> Study design: RCT = Randomized Controlled Trial; QE = Quasi-experimental; N = Naturalistic

<sup>b</sup> Number of participants included in the study analyses

<sup>c</sup> Setting from which participants were recruited: I = Inpatient; O = Outpatient; B = Both inpatient and outpatient

<sup>d</sup> Name of intervention: WRAP = Wellness Recovery Action Planning; BRIDGES = Building Recovery of Individual Dreams and Goals through Education and Support; REORDER = Recovery-Oriented Decisions for Relatives' Support; IMR = Illness Management and Recovery

<sup>e</sup> Type of provider: MHP = Mental Health Professional; P = Peer; B = Both mental health professional and peer

<sup>f</sup> Intervention Mode: G = Group; I = Individual; B = Both

<sup>g</sup> Outcome: R = Recovery; H = Hope, E = Empowerment

<sup>h</sup> Measures: RAS = Recovery Assessment Scale; HHI = Herth Hope Index; ES = Empowerment Scale; MDES = Making Decisions Empowerment Scale; RAQ = Recovery Attitudes Questionnaire; MHRM = Mental Health Recovery Measure; HS = Hope Scale; SHS = State Hope Scale; RMQ = Recovery Markers Questionnaire; DHS = Dispositional Hope Scale; QPR = Questionnaire about the Process of Recovery; RSAS = Recovery Self-Assessment Scale; MHS = Miller Hope Scale; RREEM = Ridgway Recovery Enhancing Environment Measure; SSHS = Synder State Hope Scale; PGRS = Personal Growth Recovery Scale

- Denotes missing data
